# Supplementary material for: CRISPR RNAs trigger innate immune responses in human cells
Source: PubMed Central journal article supplement — Genome Res. 2018 Mar;28(3):367–73. doi: 10.1101/gr.231936.117 (PMC5848615; doi:10.1101/gr.231936.117), 2018-03
Supplement: supp_gr.231936.117_Supplemental_Materials.pdf [file supp_gr.231936.117_Supplemental_Materials.pdf]

## Supplemental Materials for

# CRISPR RNAs trigger innate immune responses in human cells

### Table of Contents

#### Supplemental Figures and Table

**Supplemental Fig. S1.** RNA-sensing immune responses activated by the Cas9 RNP containing a 5'-triphosphated gRNA in primary mouse embryonic fibroblast (MEF) cells.

**Supplemental Fig. S2.** Percentages of cells positive for both surface CCR5 and CD4 protein in mock- and *CCR5*-targeting RNP-treated cell populations from 3 healthy donors were determined by flow cytometry.

**Supplemental Table S1.** Oligonucleotides used in this study.

**Supplemental Fig. S1.** RNA-sensing immune responses activated by the Cas9 RNP containing a 5'-triphosphated gRNA in primary mouse embryonic fibroblast (MEF) cells. (A) Schematic illustration of *Vegfa*-targeting guide RNAs, which vary according to their preparation methods. (B, C and D) Relative *Ifnb1* (B), *Ddx58* (C) and *Oas2* (D) mRNA levels in MEF cells at 24hr post-transfection. Error bars, s.e.m.; n = 3. (E) Indel frequencies induced by the *Vegfa*-targeting Cas9 RNP were measured by targeted deep sequencing. Error bars, s.e.m.; n = 3. Statistical significances were calculated by t-test.

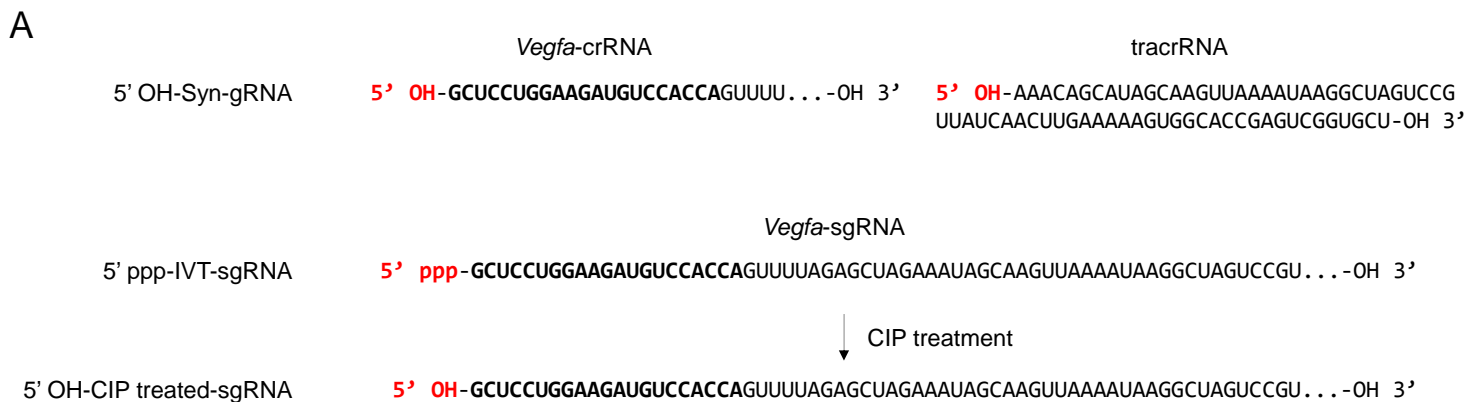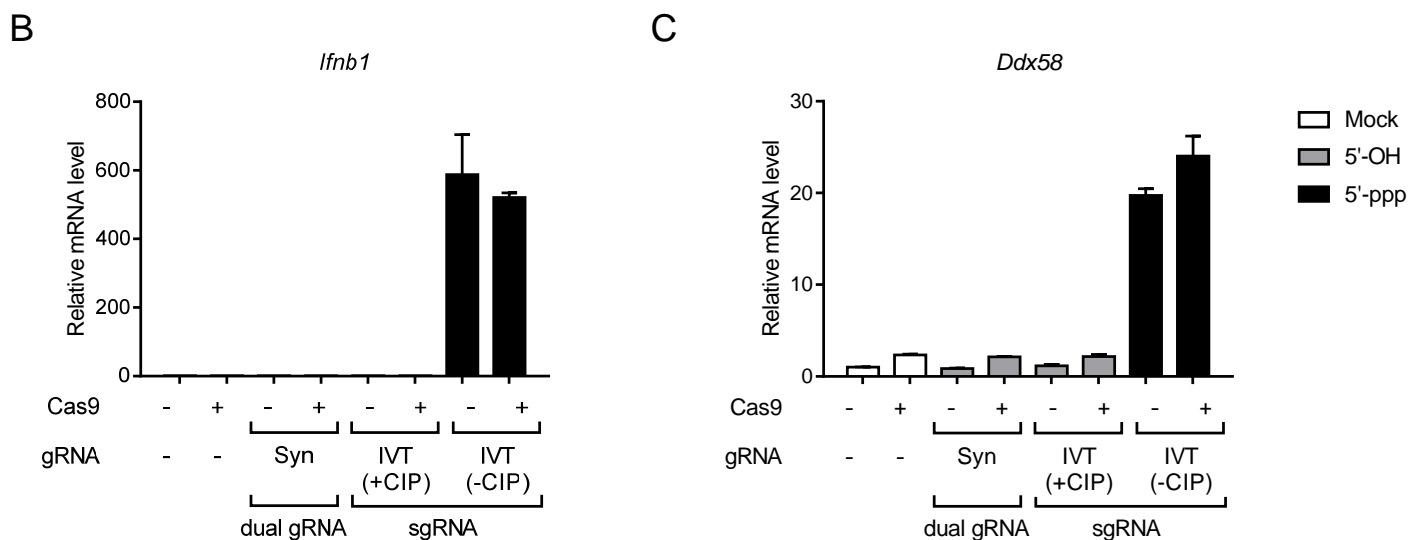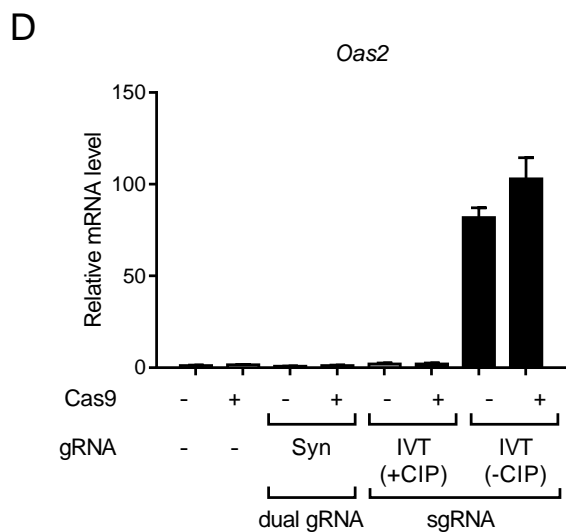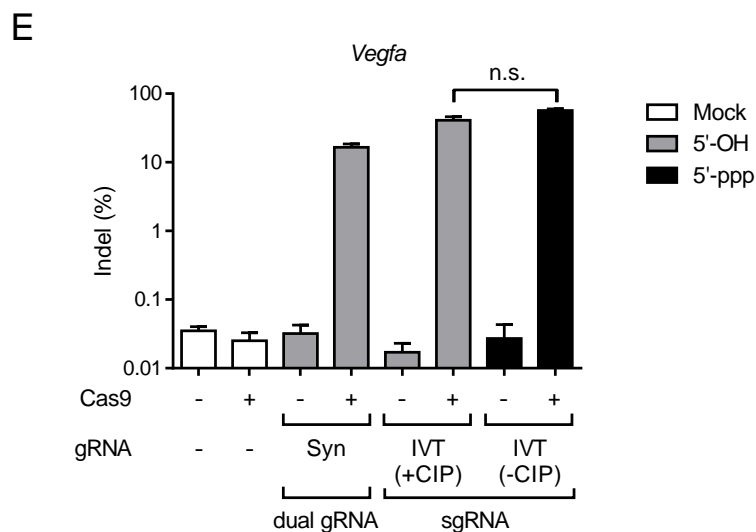

**Supplemental Fig. S2.** Percentages of cells positive for both surface CCR5 and CD4 protein in mock- and *CCR5*-targeting RNP-treated cell populations from 3 healthy donors were determined by flow cytometry.

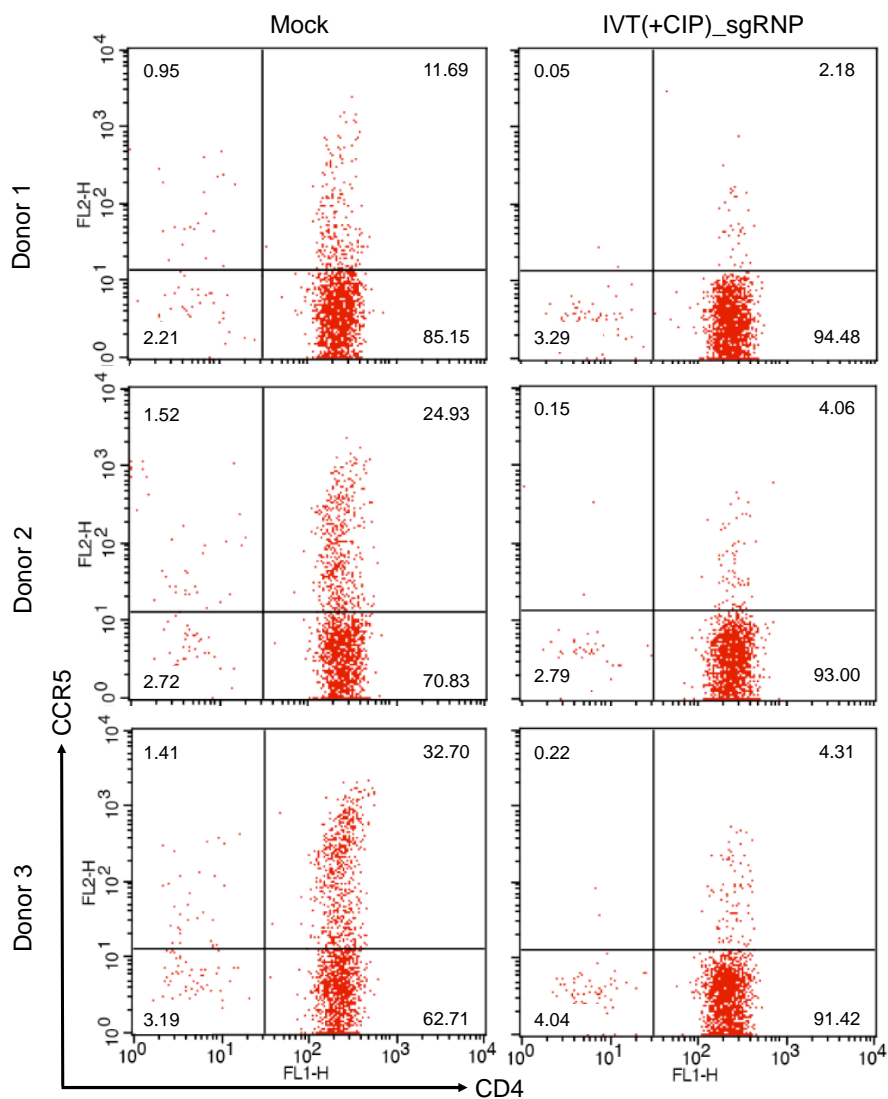

**Supplemental Table S1.** Oligonucleotides used in this study.

**List of primers used in RT-qPCR**

| Target       | Forward (5' to 3')       | Reverse (5' to 3')    |
|--------------|--------------------------|-----------------------|
| <i>ACTB</i>  | CCCAGCCATGTACGTTGCTA     | TCACCGGAGTCCATCACGAT  |
| <i>IFNB1</i> | TGCTTCTCCACTACAGCTCTT    | GCAGTATTCAAGCCTCCCAT  |
| <i>DDX58</i> | GGACGTGGCAAACAATCAG      | GCAATGTCAATGCCTTCATCA |
| <i>OAS2</i>  | TCAGAAGAGAAGCCAACGTGA    | CGGAGACAGCGAGGGTAAAT  |
| <i>Actb</i>  | CACCAGTTCGCCATGGAT       | CCTCGTCACCCACATAGGAG  |
| <i>Ifnb1</i> | CACAGCCCTCTCCATCAACT     | CTTCCATTCAAGCTGCTCCA  |
| <i>Ddx58</i> | CCACCTACATCCTCAGCTACATGA | TGGGCCCTTGTGTTCTTCT   |
| <i>Oas2</i>  | GAATCCAGCTCTGTGTCT       | AAGCAGTCTGAGAACTCCCC  |

**List of primers used in targeted deep sequencing**

| Target       | 1st PCR               |                      | 2nd PCR                                                   |                                                            |
|--------------|-----------------------|----------------------|-----------------------------------------------------------|------------------------------------------------------------|
|              | Forward (5' to 3')    | Reverse (5' to 3')   | Forward (5' to 3')                                        | Reverse (5' to 3')                                         |
| <i>HBB</i>   | GAGCCAGGCCATCACTAAAG  | TGGTATGGGGCCAAGAGATA | ACACTCTTTCCCTACAGCAGCTCTCCGATCT<br>TGCCATCAGAAACCAAGAG    | GTGACTGGAGTTCAGACGTGTGCTCTCCGATC<br>TGCAACCTCAAACAGACACCA  |
| <i>Vegfa</i> | TCGTCTTCTCACCTCAACC   | GTGGAGCTGTAAGGAGTGGT | ACACTCTTTCCCTACAGCAGCTCTCCGATCT<br>GGGCTTCATCGTTACAGCAG   | GTGACTGGAGTTCAGACGTGTGCTCTCCGATC<br>TCACAAATCTGGGTGGCGATA  |
| <i>DNMT1</i> | CCAGAAGTCCCGTGCAAAATC | ATCTTTCTCAAGGGGCTGCT | ACACTCTTTCCCTACAGCAGCTCTCCGATCT<br>CAGTGCATGTTGGGATTCC    | GTGACTGGAGTTCAGACGTGTGCTCTCCGATC<br>TTGAACGTTCCCTTAGCACTCT |
| <i>CCR5</i>  | GAGCCAAGCTCTCCATCTAGT | GCCCTGTCAAGAGTTGACAC | ACACTCTTTCCCTACAGCAGCTCTCCGATCT<br>GCCTCTGCCTCCGCTTACTCAC | GTGACTGGAGTTCAGACGTGTGCTCTCCGATC<br>TCCAAAGTCCCCTGGGCGGC   |

**Oligonucleotides for *in vitro* transcription templates**

|            | Target       | Sequence (5' to 3')                                                               |
|------------|--------------|-----------------------------------------------------------------------------------|
| sgRNA_F    | <i>HBB</i>   | GAAATTAATACGACTCACTATAGGGGAGGGGAAGTTTGCTCCGTTTATAGACTAGAAATAGCAAG                 |
|            | <i>Vegfa</i> | GAAATTAATACGACTCACTATAGGAGGAGGGGAGTCTGCTCCGTTTATAGACTAGAAATAGCAAG                 |
|            | <i>CCR5</i>  | GAAATTAATACGACTCACTATAGCAGCATAGTGAGCCAGAAGTTTATAGACTAGAAATAGCAAG                  |
| sgRNA_R    |              | AAAAAAGCACCGACTCGGTGCCACTTTTTCAAGTTGATAACGGACTAGCCTATTTTAACTTGCTATTTCTAGCTCTAAAAC |
| crRNA_F    | <i>HBB</i>   | GAAATTAATACGACTCACTATAGTTGCCCCACAGGGCAGTAAGTTTATAGACTATGCTGTTTTG                  |
| crRNA_R    |              | CAAAACAGCATAGCTCTAAAACCTACTGCCCTGTGGGCAACATAGTGAGTCGTATTAATTTTC                   |
| tracrRNA_F |              | GAAATTAATACGACTCACTATAGGAACATTCAAACAGCATAGCAAGTTAAAATAAGGCTAGTCCG                 |
| tracrRNA_R |              | AAAAAAGCACCGACTCGGTGCCACTTTTTCAAGTTGATAACGGACTAGCCTATTTTAACTTGCTATG               |
| crRNA_F    | <i>DNMT1</i> | GAAATTAATACGACTCACTATAGGG                                                         |
| crRNA_R    |              | GAGTAACAGACATGGACCATCAGATCTACAAGAGTAGAAATTACCTATAGTGAGTCGTATTAATTTTC              |
